# Supplementary material for: The Impact on Survival and Morbidity of Portal–Mesenteric Resection During Pancreaticoduodenectomy for Pancreatic Head Adenocarcinoma: A Systematic Review and Meta-Analysis of Comparative Studies
Source: PubMed Central journal article supplement (PMC7409306; doi:10.3390/cancers12071976), 2020-07-20
Supplement: cancers-12-01976-s001.pdf [file cancers-12-01976-s001.pdf]

# Supplementary Materials: The Impact on Survival and Morbidity of Portal–Mesenteric Resection During Pancreaticoduodenectomy for Pancreatic Head Adenocarcinoma: A Systematic Review and Meta-Analysis of Comparative Studies

Alessandro Fancellu, Niccolò Petrucciani, Alberto Porcu, Giulia Deiana, Valeria Sanna, Chiara Ninniri, Teresa Perra, Valentina Celoria and Giuseppe Nigri

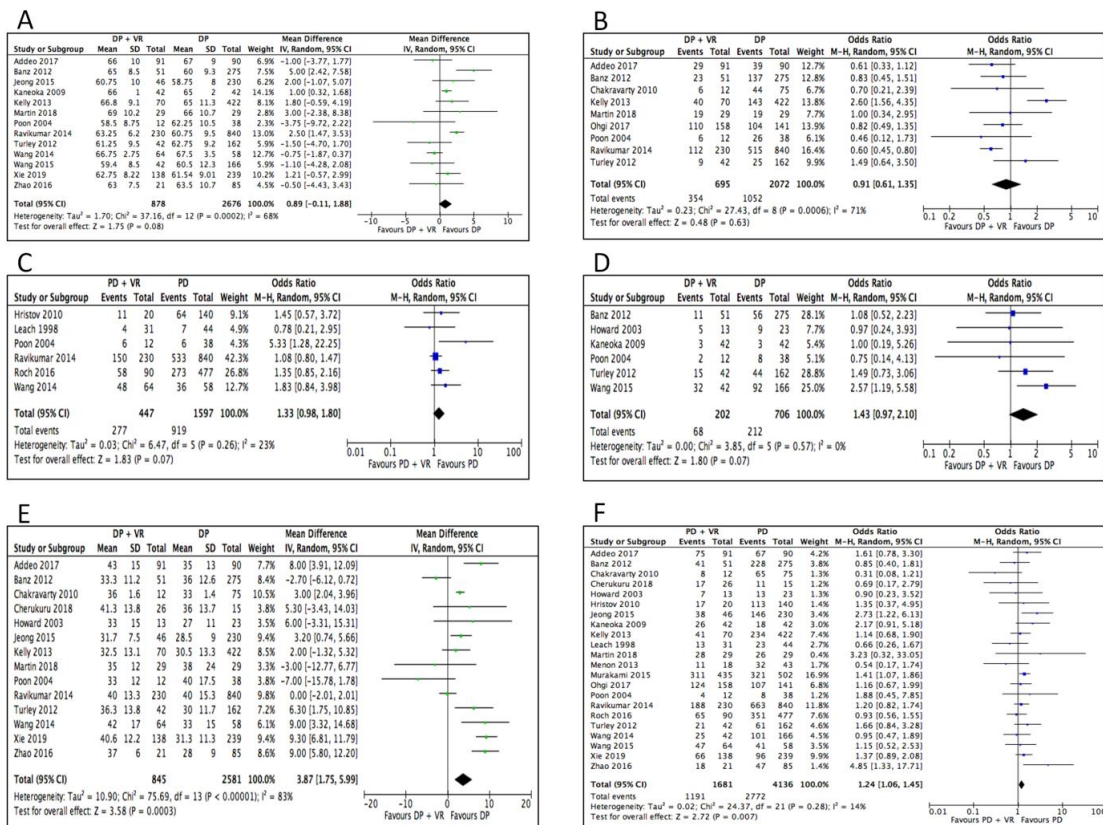

**Figure S1.** Meta-analysis of patients and tumor characteristics. (A) Age. (B) Need for preoperative biliary drainage. (C) Lymphovascular invasion. (D) Poorly differentiated. (E) Tumor size. (F) Positive lymph nodes.

A

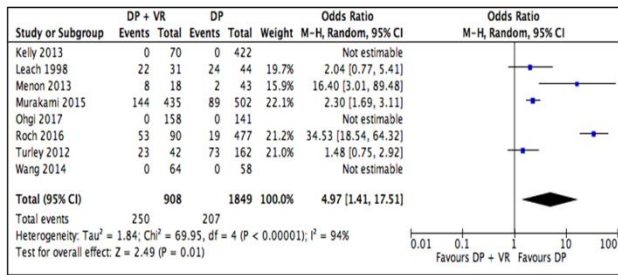

B

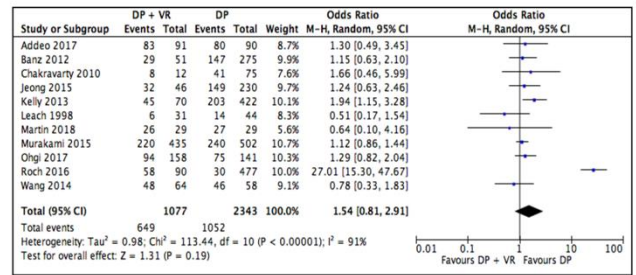

Figure S2. Meta-analysis of use of neoadjuvant chemotherapy (A) and adjuvant chemotherapy (B).

Table S1. Full electronic search strategy used for online databases and data extraction, inclusion and exclusion criteria.

| Keyword used and combined for the search*       | PubMed** | Scopus** | WOS**  |
|-------------------------------------------------|----------|----------|--------|
| Pancreaticoduodenectomy                         | 8.555    | 16.402   | 5.956  |
| Duodenopancreatectomy                           | 8.674    | 743      | 362    |
| Whipple OR Kaush-Wipple operation               | 3.864    | 1.131    | 4.368  |
| Venous resection                                | 9.506    | 9.650    | 6.124  |
| Portal resection                                | 5.209    | 10.905   | 7.007  |
| Mesenteric vein resection                       | 1.084    | 2.365    | 1.054  |
| Portal-mesenteric OR porto-mesenteric resection | 92       | 32       | 106    |
| Pancreatic carcinoma                            | 4.990    | 38.942   | 30.095 |
| Pancreatic head carcinoma                       | 2.710    | 3.680    | 2.910  |

\* systematic literature search using the specified databases was performed in December 2019.

\*\*number of hits

Inclusion criteria:

- Studies comparing surgical outcomes and survival outcomes of PD with portal-mesenteric vein resection (PD+VR) and standard PD in patients with PHAC.
- Studies containing a previously unreported patient group.

Exclusion criteria:

- Studies including tumors other than pancreatic adenocarcinoma (such as ampullary carcinoma, cholangiocarcinoma, primitive duodenal cancer, and malignant neuroendocrine tumors);
- Studies including pancreatic cancer treated with total pancreatectomy or distal pancreatectomy;
- Studies including patients in whom also arterial resection was carried out along with portal-superior mesenteric resection.

**Table S2.** Critical appraisal of included studies using Newcastle Ottawa scale.

| Study, year            | Stars number           |                            |                      | Total |
|------------------------|------------------------|----------------------------|----------------------|-------|
|                        | Selection <sup>a</sup> | Comparability <sup>b</sup> | Outcome <sup>c</sup> |       |
| Leach, 1998 [31]       | 4                      | 0                          | 3                    | 7     |
| Howard, 2003 [29]      | 4                      | 0                          | 3                    | 7     |
| Poon, 2004 [36]        | 3                      | 0                          | 3                    | 6     |
| Kaneoka, 2009 [26]     | 4                      | 0                          | 4                    | 8     |
| Toomey, 2009 [39]      | 2                      | 0                          | 3                    | 5     |
| Chakravarty, 2010 [24] | 4                      | 0                          | 3                    | 7     |
| Hristov, 2010 [28]     | 3                      | 0                          | 3                    | 6     |
| Banz, 2011 [23]        | 3                      | 0                          | 3                    | 6     |
| Turley, 2012 [40]      | 3                      | 0                          | 3                    | 6     |
| Kelly, 2013 [27]       | 3                      | 0                          | 3                    | 6     |
| Menon, 2013 [33]       | 3                      | 0                          | 3                    | 6     |
| Wang, 2014 [41]        | 4                      | 0                          | 3                    | 7     |
| Ravikumar, 2014 [37]   | 4                      | 0                          | 3                    | 7     |
| Wang, 2015 [8]         | 3                      | 0                          | 3                    | 6     |
| Jeong, 2015 [30]       | 3                      | 0                          | 3                    | 6     |
| Murakami, 2015 [34]    | 4                      | 0                          | 3                    | 7     |
| Zhao, 2016 [43]        | 3                      | 0                          | 3                    | 6     |
| Roch, 2016 [38]        | 3                      | 0                          | 3                    | 6     |
| Ohgi, 2017 [35]        | 3                      | 0                          | 3                    | 6     |
| Addeo, 2017 [12]       | 4                      | 0                          | 3                    | 7     |
| Martin, 2018 [32]      | 4                      | 1                          | 3                    | 8     |
| Cherukuru, 2018 [25]   | 3                      | 0                          | 3                    | 6     |
| Xie, 2019 [42]         | 3                      | 1                          | 3                    | 7     |

<sup>a</sup> Maximum 4 stars; <sup>b</sup> Maximum 2 stars; <sup>c</sup> Maximum 3 stars.

**Table S3.** Type of venous resection and reconstruction performed in the patients of the PD+VR group.

| Author             | Type of Venous resection and Venous Reconstruction                                                                                                                      |
|--------------------|-------------------------------------------------------------------------------------------------------------------------------------------------------------------------|
| Addeo P [12]       | End-to-end anastomosis: 91 (100%)                                                                                                                                       |
| Banz VM [23]       | Primary anastomosis: 48 (94.1%)<br>Donor vein: 2 (3.9%)<br>Autologous vein: 1 (2%)                                                                                      |
| Chakravarty K [24] | End-to-end anastomosis: 9 (75%)<br>Autologous graft: 1 (8.3%)<br>PTFE graft: 2 (16.7%)                                                                                  |
| Cherukuru R [25]   | Segmental resection: 25 (96.2%)<br>Sleeve resection: 1 (3.8%)<br>Primary anastomosis: 12 (46.2%)<br>Autologous vein graft: 10 (38.5%)<br>PTFE graft: 3 (11.5%)          |
| Howard TJ [29]     | End-to-end anastomosis: 6 (46%)<br>Lateral venorrhaphy: 5 (38%) [one with saphenous vein patch]<br>Resection and interposition vein graft 2 (15%)                       |
| Hristov B [28]     | Primary closure: 12 (60%)<br>End-to-end anastomosis: 6 (30%)<br>Interposition grafts: 2 (10%) [one autologous saphenous vein; one PTFE graft]                           |
| Jeong J [30]       | Partial vein resection with primary closure: 12 (26.1%)<br>Segmental resection with anastomosis: 34 (73.9%) [1 cadaveric vein graft; 1 autologous saphenous vein graft] |
| Kaneoka Y [26]     | End-to-end anastomosis: 27 (64.3%)<br>External iliac vein interposition graft: 15 (35.7%)                                                                               |
| Kelly KJ [27]      | Tangential or segmental vein resection: 70 (100%)                                                                                                                       |

**Table S3.** *Cont.*

|                  |                                                                                                                                                                                                                                                                                                                       |
|------------------|-----------------------------------------------------------------------------------------------------------------------------------------------------------------------------------------------------------------------------------------------------------------------------------------------------------------------|
| Leach SD [31]    | Saphenous vein patch: 4 (12.9%)<br>End-to-end anastomosis with ligation and division of the splenic vein: 8 (25.8%)<br>Primary end-to-end anastomosis without ligation and division of the splenic vein: 7 (22.6%)<br>Internal jugular vein interposition graft: 11 (35.5%)<br>Gore-Tex interposition graft: 1 (3.2%) |
| Martin D [32]    | End-to-end anastomosis: 20 (69%)<br>PTFE graft: 6 (21%)<br>Wedge resection with direct closure: 3 (10%)                                                                                                                                                                                                               |
| Menon VG [33]    | End-to-end anastomosis: 12 (67%)<br>Internal jugular vein graft: 1 (5.6%)<br>Renal vein graft: 2 (11.1%)<br>Synthetic graft: 3 (16.7%)                                                                                                                                                                                |
| Murakami Y [34]  | Wedge resection: 76 (17.5%)<br>Segmental resection: 353 (81.1%)<br>End-to-end reconstruction: 323 (91.5%)<br>Autologous vein interposition graft: 30 (8.5%)                                                                                                                                                           |
| Ohgi K [35]      | Tangential wedge resection: 17 (12%)<br>Segmental resection: 125 (88%)                                                                                                                                                                                                                                                |
| Poon RT [36]     | Wedge resection: 4 (33.3%)<br>End-to-end anastomosis: 8 (66.7%)                                                                                                                                                                                                                                                       |
| Ravikumar R [37] | Primary closure: 129 (56.1%)<br>End-to-end anastomosis: 65 (28.3%)<br>Interposition graft: 36 (15.7%)                                                                                                                                                                                                                 |
| Roch AM [38]     | End-to-end anastomosis: 67 (74.4%)<br>Internal jugular vein graft: 19 (21.1%)<br>Renal vein graft: 1 (1.1%)<br>Saphenous vein graft: 1 (1.1%)<br>PTFE graft: 2 (2.2%)                                                                                                                                                 |
| Toomey P [39]    | Lateral venorrhaphy: 44 (91.6%)<br>Saphenous vein graft: 2 (4.2%)<br>End-to-end anastomosis: 2 (4.2%)                                                                                                                                                                                                                 |
| Turley RS [40]   | Primary repair: 8 (19%)<br>Vein patch: 25 (59.5%)<br>Interposition graft: 9 (21.4%)                                                                                                                                                                                                                                   |
| Wang F [41]      | End-to-end anastomosis: 54 (84.4%)<br>Lateral venorrhaphy: 9 (14.1%)<br>Synthetic graft: 1 (1.6%)                                                                                                                                                                                                                     |
| Wang WL [8]      | End-to-end anastomosis: 28 (66.7%).<br>Interposition venous allograft (portal veins or iliac arteries from liver transplant donors): 14 (33.3%)                                                                                                                                                                       |
| Xie ZB [42]      | Primary closure of the vein, and reconstructed with PTFE vascular grafts: 138 (100%)                                                                                                                                                                                                                                  |
| Zhao X [43]      | Interposition of Iliac vein from cadaver donor: 21 (100%)                                                                                                                                                                                                                                                             |

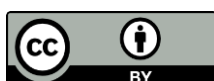

© 2020 by the authors. Licensee MDPI, Basel, Switzerland. This article is an open access article distributed under the terms and conditions of the Creative Commons Attribution (CC BY) license (<http://creativecommons.org/licenses/by/4.0/>).
